# Supplementary material for: Artemisinin May Disrupt Hyphae Formation by Suppressing Biofilm-Related Genes of Candida albicans: In Vitro and In Silico Approaches
Source: MDPI journal article supplement (doi:10.3390/antibiotics13040310), 2024-03-28
Supplement: s1 [file s1]

**Table S1.** The MIC values of the artemisinin and FLC against *Candida albicans* strains.

| Strain Number | Identification                   | Artemisinin | FLC |
|---------------|----------------------------------|-------------|-----|
| 1A            | <i>C. albicans</i>               | 640         | 1   |
| 2A            | <i>C. albicans</i>               | 640         | 2   |
| 4A            | <i>C. albicans</i>               | 1280        | 2   |
| 6A            | <i>C. albicans</i>               | 1280        | 1   |
| 7A            | <i>C. albicans</i>               | 320         | 1   |
| 9A            | <i>C. albicans</i>               | 1280        | 2   |
| 10A           | <i>C. albicans</i>               | 640         | 2   |
| 11A           | <i>C. albicans</i>               | 320         | 0.5 |
| 13A           | <i>C. albicans</i>               | 1280        | 2   |
| 15A           | <i>C. albicans</i>               | 1280        | 2   |
| 17A           | <i>C. albicans</i>               | 1280        | 1   |
| 18A           | <i>C. albicans</i>               | 640         | 1   |
| 19A           | <i>C. albicans</i>               | 640         | 2   |
| 21A           | <i>C. albicans</i>               | 1280        | 1   |
| 26A           | <i>C. albicans</i>               | 1280        | 1   |
| 27A           | <i>C. albicans</i>               | 1280        | 4   |
| 28A           | <i>C. albicans</i>               | 1280        | 1   |
| 29A           | <i>C. albicans</i>               | 1280        | 1   |
| 31A           | <i>C. albicans</i>               | 1280        | 2   |
| 61A           | <i>C. albicans</i>               | 320         | 0.5 |
| 66A           | <i>C. albicans</i>               | 640         | 1   |
| 67A           | <i>C. albicans</i>               | 640         | 2   |
| 74A           | <i>C. albicans</i>               | 640         | 2   |
| 75A           | <i>C. albicans</i>               | 1280        | 2   |
| 76A           | <i>C. albicans</i>               | 640         | 4   |
| 80A           | <i>C. albicans</i>               | 640         | 2   |
| 88A           | <i>C. albicans</i>               | 1280        | 1   |
| 94A           | <i>C. albicans</i>               | 1280        | 4   |
| 62A           | <i>C. lusitanae</i>              | 640         | 1   |
| 65A           | <i>C. lusitanae</i>              | 160         | 4   |
| 22A           | <i>C. kefyr</i>                  | 80          | 1   |
| 71A           | <i>C. kefyr</i>                  | 80          | 4   |
| 97A           | <i>C. kefyr</i>                  | 80          | 2   |
| 56A           | <i>C. guilliermondii</i>         | 20          | 2   |
| 58A           | <i>C. guilliermondii</i>         | 20          | 2   |
| 54A           | <i>C. tropicalis</i>             | 160         | 4   |
| 48A           | <i>C. tropicalis</i>             | 160         | 2   |
| 55A           | <i>C. tropicalis</i>             | 320         | 2   |
| 42A           | <i>C. tropicalis</i>             | 160         | 1   |
| 35A           | <i>C. krusei</i>                 | 5           | 32  |
| 81A           | <i>C. krusei</i>                 | 5           | 64  |
| 82A           | <i>C. krusei</i>                 | 5           | 64  |
| 83A           | <i>C. krusei</i>                 | 5           | 64  |
| 47A           | <i>C. tropicalis</i> NRRLY-12968 | 320         | 8   |
| 78A           | <i>C. krusei</i> ATCC 6258       | 10          | 128 |
| 102A          | <i>C. albicans</i> ATCC 10231    | 640         | 0.5 |
